# Supplementary material for: Antibiotic Resistance in Vibrio cholerae: Mechanistic Insights from IncC Plasmid-Mediated Dissemination of a Novel Family of Genomic Islands Inserted at trmE
Source: mSphere. 2020 Aug 26;5(4):e00748-20. doi: 10.1128/mSphere.00748-20 (PMC7449626; doi:10.1128/mSphere.00748-20)
Supplement: FIG S3 [file mSphere.00748-20-sf003.pdf]

# MGIVchHai6 (47,437 bp)

*V. cholerae* non-O1/non-O139 HC-36A1

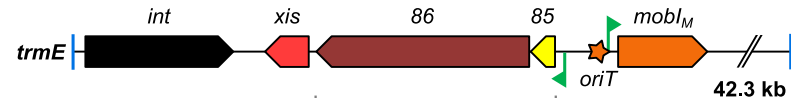

- Recombination
- Recombination directionality factor
- MobI homolog
- Transcriptional regulator
- DUF927
- Unknown
- AcaCD/SetCD binding site
- attL* and *attR* sites

# MGIVflInd1 (23,229 bp)

*V. fluvialis* H-08942

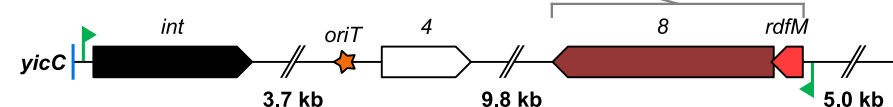

1 kb
