# Supplementary material for: Antibiotic Resistance in Vibrio cholerae: Mechanistic Insights from IncC Plasmid-Mediated Dissemination of a Novel Family of Genomic Islands Inserted at trmE
Source: PubMed Central journal article supplement (PMC7449626; doi:10.1128/msphere.00748-20), 2020-08-26

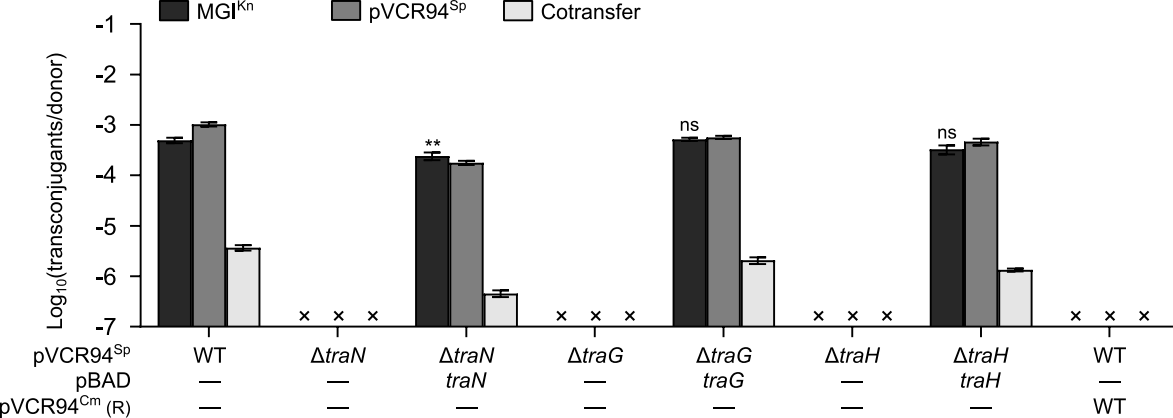

Supplement: mSphere.00748-20-sf002.pdf [file mSphere.00748-20-sf002.pdf]
